# Supplementary material for: Detection of alternative lengthening of telomeres by telomere quantitative PCR
Source: PubMed Central journal article supplement — Nucleic Acids Res. 2012 Aug 24;41(2):e34. doi: 10.1093/nar/gks781 (PMC3553966; doi:10.1093/nar/gks781), 2012-08-24
Supplement: supp_gks781_Supplementary_data_Lau_et_al.pdf [file supp_gks781_Supplementary_data_Lau_et_al.pdf]

Supplementary Table 1. Characteristics of the 25 cell lines

| Cell line  | Type               | TMM | Reference  |
|------------|--------------------|-----|------------|
| CHLA-90    | NB                 | ALT | this study |
| G-292      | OS                 | ALT | (8,21)     |
| GM847      | Fibroblast (SV40)  | ALT | (22)       |
| IIICF-c    | Fibroblast (SV40)  | ALT | (22)       |
| MeT-4A     | Mesothelial (SV40) | ALT | (22)       |
| SK-LU-1    | Lung carcinoma     | ALT | (8,21)     |
| SK-N-FI    | NB                 | ALT | this study |
| U-2 OS     | OS                 | ALT | (8,21)     |
| W-V        | Fibroblast (SV40)  | ALT | (23)       |
| CHP-100    | PNET               | TEL | this study |
| CHP-134    | NB                 | TEL | (24)       |
| LAN-2      | NB                 | TEL | (24)       |
| LAN-5      | NB                 | TEL | (24)       |
| MCF-7      | Breast carcinoma   | TEL | (21)       |
| MDA-MB-231 | Breast carcinoma   | TEL | (25)       |
| MG-63      | OS                 | TEL | (8,21)     |
| NB69       | NB                 | TEL | (24)       |
| NM179      | ML                 | TEL | this study |
| NM39       | ML                 | TEL | this study |
| SK-N-AS    | NB                 | TEL | (24)       |
| SK-N-BE2   | NB                 | TEL | this study |
| SK-N-DZ    | NB                 | TEL | this study |
| SY5Y       | NB                 | TEL | (24)       |

ML, melanoma; NB, neuroblastoma, OS, osteosarcoma;

PNET, primitive neuroectodermal tumor; SV40, immortalized following transduction with simian virus 40 genes; TEL, telomerase.

Note: CHLA-90 cell line was obtained from the Children's Oncology Group Neuroblastoma Cell Line Repository.

#### Additional references

21. Bryan, T.M., Englezou, A., Dalla-Pozza, L., Dunham, M.A. and Reddel, R.R. (1997) Evidence for an alternative mechanism for maintaining telomere length in human tumors and tumor-derived cell lines *Nat Med*, **3**, 1271-1274.
22. Bryan, T.M., Englezou, A., Gupta, J., Bacchetti, S. and Reddel, R.R. (1995) Telomere elongation in immortal human cells without detectable telomerase activity *Embo J*, **14**, 4240-4248.
23. Fasching, C.L., Bower, K. and Reddel, R.R. (2005) Telomerase-independent telomere length maintenance in the absence of alternative lengthening of telomeres-associated promyelocytic leukemia bodies *Cancer Res*, **65**, 2722-2729
24. Binz, N., Shalaby, T., Rivera, P., Shin-ya, K. and Grotzer, M.A. (2005) Telomerase inhibition, telomere shortening, cell growth suppression and induction of apoptosis by telomestatin in childhood neuroblastoma cells *Eur J Cancer*, **41**, 2873-2881.
25. Goueli, B.S. and Janknecht, R. (2003) Regulation of telomerase reverse transcriptase gene activity by upstream stimulatory factor *Oncogene*, **22**, 8042-8047.
